# Supplementary material for: The Influence of Chemical Contaminants on the Physicochemical Properties of Unifloral and Multifloral Honey
Source: MDPI journal article supplement (doi:10.3390/foods10051039), 2021-05-10
Supplement: s1 [file s1]

**Table S1.** Supplement material – Mineral elements of analyzed honey samples

| Honey Variety |     | Multielement, mg/kg |              |             |              |           |           |            |           |           |           |           |
|---------------|-----|---------------------|--------------|-------------|--------------|-----------|-----------|------------|-----------|-----------|-----------|-----------|
|               |     | Na                  | K            | Mg          | Ca           | Mn        | Cu        | Fe         | Zn        | Ni        | Pb        | Cd        |
| Rapeseed      | R1  | 152.60±0.10         | 812.72±0.23  | 61.19±0.61  | 161.97±0.11  | 1.03±0.01 | 2.33±0.38 | 23.89±0.15 | 3.21±0.27 | 0.78±0.01 | 0.08±0.03 | 0.02±0.02 |
|               | R2  | 162.13±0.15         | 817.28±0.32  | 65.98±0.03  | 175.89±0.14  | 1.43±0.04 | 2.09±0.06 | 23.05±0.13 | 3.20±0.05 | 0.49±0.08 | 0.04±0.02 | 0.04±0.02 |
|               | R3  | 155.28±0.14         | 810.82±0.23  | 64.29±0.07  | 156.09±0.10  | 1.26±0.06 | 1.98±0.05 | 24.37±0.21 | 3.01±0.02 | 0.63±0.06 | 0.02±0.01 | 0.01±0.01 |
|               | R4  | 150.32±0.12         | 815.12±0.18  | 61.09±0.12  | 159.67±0.12  | 1.09±0.05 | 2.22±0.06 | 22.46±0.07 | 2.67±0.03 | 0.57±0.02 | 0.05±0.02 | 0.03±0.01 |
|               | R5  | 148.29±0.21         | 819.23±0.02  | 71.49±0.04  | 164.27±0.10  | 0.97±0.10 | 2.76±0.01 | 22.98±0.06 | 3.54±0.01 | 0.48±0.03 | 0.01±0.02 | 0.02±0.02 |
|               | R6  | 151.93±0.06         | 809.02±0.18  | 70.28±0.14  | 266.98±0.15  | 1.01±0.04 | 2.13±0.04 | 23.48±0.05 | 3.24±0.05 | 0.79±0.02 | 0.02±0.01 | 0.01±0.02 |
| Black locust  | BL1 | 103.50±0.26         | 468.75±0.72  | 44.39±0.53  | 51.71±0.03   | 1.14±0.25 | 1.63±0.59 | 12.80±0.47 | 1.76±0.08 | 0.03±0.01 | 0.01±0.01 | 0.00±0.01 |
|               | BL2 | 108.14±0.18         | 463.98±0.26  | 44.98±0.07  | 55.12±0.06   | 0.95±0.03 | 1.67±0.05 | 12.02±0.03 | 1.98±0.04 | 0.03±0.02 | 0.01±0.01 | 0.00±0.01 |
|               | BL3 | 105.25±0.03         | 454.38±0.06  | 44.09±0.14  | 52.09±0.10   | 0.98±0.05 | 1.45±0.02 | 11.98±0.09 | 1.56±0.05 | 0.01±0.01 | 0.01±0.02 | 0.00±0.01 |
|               | BL4 | 123.58±0.15         | 473.91±0.14  | 44.89±0.02  | 49.03±0.07   | 1.19±0.02 | 1.78±0.05 | 11.45±0.02 | 1.87±0.01 | 0.02±0.02 | 0.00±0.00 | 0.01±0.02 |
|               | BL5 | 118.64±0.07         | 471.12±0.10  | 43.11±0.15  | 45.98±0.01   | 1.57±0.03 | 1.38±0.02 | 12.76±0.07 | 1.39±0.02 | 0.02±0.10 | 0.01±0.01 | 0.01±0.02 |
|               | BL6 | 111.12±0.14         | 466.41±0.15  | 46.92±0.01  | 52.13±0.12   | 1.32±0.04 | 1.77±0.04 | 13.02±0.01 | 1.23±0.05 | 0.03±0.02 | 0.01±0.01 | 0.00±0.01 |
| Sunflower     | S1  | 148.34±0.02         | 638.58±0.18  | 52.17±0.07  | 102.27±0.15  | 0.86±0.02 | 1.56±0.05 | 28.24±0.07 | 2.62±0.02 | 0.14±0.01 | 0.02±0.01 | 0.00±0.01 |
|               | S2  | 155.22±0.14         | 630.28±0.12  | 55.29±0.12  | 108.05±0.14  | 0.76±0.06 | 1.67±0.10 | 28.14±0.02 | 2.76±0.03 | 0.09±0.02 | 0.01±0.01 | 0.01±0.02 |
|               | S3  | 150.48±0.10         | 622.15±0.04  | 51.98±0.14  | 97.13±0.03   | 0.75±0.05 | 1.98±0.06 | 32.09±0.10 | 3.18±0.02 | 0.01±0.01 | 0.01±0.02 | 0.00±0.01 |
|               | S4  | 145.89±0.12         | 637.84±0.36  | 49.99±0.06  | 99.41±0.07   | 0.87±0.08 | 2.19±0.03 | 37.01±0.09 | 2.33±0.01 | 0.10±0.01 | 0.01±0.01 | 0.01±0.01 |
|               | S5  | 145.36±0.01         | 652.46±0.03  | 54.36±0.13  | 145.02±0.10  | 0.82±0.01 | 2.09±0.05 | 30.56±0.18 | 3.98±0.03 | 0.17±0.04 | 0.03±0.02 | 0.01±0.01 |
|               | S6  | 147.72±0.12         | 654.19±0.15  | 50.12±0.07  | 129.56±0.15  | 0.93±0.02 | 1.63±0.06 | 24.31±0.25 | 5.03±0.07 | 0.15±0.03 | 0.01±0.01 | 0.03±0.02 |
| Buckwheat     | B1  | 321.12±0.10         | 398.54±0.30  | 329.09±0.18 | 1286.43±0.65 | 6.27±0.06 | 0.25±0.03 | 3.94±0.07  | 7.22±0.12 | 0.22±0.02 | 0.13±0.03 | 0.01±0.02 |
|               | B2  | 325.29±0.18         | 390.06±0.12  | 333.07±0.10 | 1256.90±0.12 | 6.45±0.10 | 0.43±0.05 | 4.98±0.04  | 8.01±0.06 | 0.17±0.01 | 0.04±0.02 | 0.01±0.01 |
|               | B3  | 298.38±0.17         | 379.28±0.04  | 374.10±0.14 | 1198.04±0.37 | 6.97±0.06 | 0.29±0.01 | 4.28±0.06  | 5.08±0.09 | 0.06±0.03 | 0.02±0.02 | 0.05±0.03 |
|               | B4  | 339.17±0.12         | 401.16±0.18  | 396.46±0.02 | 1265.34±0.18 | 6.75±0.06 | 0.23±0.04 | 4.08±0.08  | 6.08±0.10 | 0.32±0.05 | 0.01±0.01 | 0.08±0.03 |
|               | B5  | 320.08±0.14         | 383.58±0.01  | 317.59±0.06 | 1298.65±0.42 | 5.12±0.05 | 0.56±0.02 | 3.67±0.04  | 4.67±0.06 | 0.23±0.01 | 0.08±0.01 | 0.07±0.02 |
|               | B6  | 299.76±0.18         | 396.57±0.12  | 297.42±0.12 | 1209.74±0.28 | 7.65±0.01 | 0.28±0.01 | 3.25±0.07  | 7.09±0.07 | 0.43±0.02 | 0.18±0.03 | 0.08±0.03 |
| Mint          | M1  | 163.67±0.06         | 1873.69±0.35 | 408.82±0.15 | 1590.17±0.12 | 0.97±0.07 | 0.32±0.02 | 3.64±0.01  | 1.17±0.02 | 0.87±0.07 | 0.08±0.02 | 0.02±0.03 |
|               | M2  | 185.35±0.22         | 1801.03±0.18 | 400.38±0.34 | 1529.75±0.48 | 1.45±0.04 | 0.65±0.05 | 3.56±0.05  | 1.87±0.02 | 0.80±0.03 | 0.01±0.01 | 0.00±0.01 |
|               | M3  | 166.13±0.15         | 1639.59±0.03 | 356.98±0.10 | 1593.01±0.25 | 2.15±0.06 | 0.37±0.04 | 3.92±0.07  | 2.67±0.03 | 0.45±0.01 | 0.00±0.00 | 0.00±0.01 |
|               | M4  | 171.17±0.04         | 1708.73±0.37 | 428.63±0.18 | 1538.57±0.36 | 1.78±0.01 | 0.28±0.06 | 4.19±0.05  | 1.87±0.01 | 0.98±0.03 | 0.32±0.03 | 0.05±0.03 |
|               | M5  | 164.92±0.18         | 1812.48±0.10 | 419.06±0.14 | 1409.29±0.04 | 0.87±0.05 | 0.47±0.03 | 4.87±0.04  | 1.64±0.06 | 0.96±0.12 | 0.29±0.06 | 0.03±0.02 |
|               | M6  | 161.72±0.15         | 1789.36±0.45 | 427.92±0.15 | 1603.45±0.46 | 0.99±0.01 | 0.45±0.04 | 4.67±0.06  | 1.79±0.07 | 1.02±0.03 | 0.33±0.03 | 0.08±0.01 |

Table S1. Cont.

| Honey Variety |     | Multielement, mg/kg |              |            |             |           |           |            |           |           |           |           |
|---------------|-----|---------------------|--------------|------------|-------------|-----------|-----------|------------|-----------|-----------|-----------|-----------|
|               |     | Na                  | K            | Mg         | Ca          | Mn        | Cu        | Fe         | Zn        | Ni        | Pb        | Cd        |
| Dandelion     | D1  | 74.17±0.12          | 5110.34±0.33 | 9.87±0.06  | 611.23±0.14 | 3.61±0.06 | 0.36±0.06 | 4.21±0.02  | 0.65±0.04 | 0.35±0.02 | 0.09±0.02 | 0.03±0.01 |
|               | D2  | 83.15±0.10          | 4912.08±0.26 | 15.08±0.12 | 600.54±0.10 | 3.24±0.07 | 0.56±0.03 | 4.56±0.01  | 0.60±0.01 | 0.39±0.03 | 0.05±0.03 | 0.03±0.03 |
|               | D3  | 77.28±0.14          | 4538.95±0.28 | 6.45±0.03  | 587.93±0.22 | 3.87±0.02 | 0.55±0.05 | 4.29±0.07  | 0.64±0.06 | 0.33±0.01 | 0.03±0.01 | 0.02±0.02 |
|               | D4  | 76.59±0.05          | 5528.09±0.25 | 20.18±0.12 | 607.19±0.14 | 3.68±0.06 | 0.49±0.04 | 3.29±0.10  | 0.59±0.01 | 0.41±0.09 | 0.08±0.05 | 0.05±0.03 |
|               | D5  | 72.02±0.04          | 5361.72±0.37 | 17.42±0.14 | 599.02±0.27 | 3.98±0.04 | 9.67±0.05 | 4.01±0.06  | 0.71±0.03 | 0.42±0.01 | 0.09±0.03 | 0.02±0.01 |
|               | D6  | 79.47±0.14          | 5004.65±0.65 | 13.67±0.16 | 562.48±0.10 | 4.19±0.03 | 0.44±0.06 | 3.82±0.04  | 0.66±0.05 | 0.39±0.11 | 0.01±0.03 | 0.03±0.03 |
| Meadow        | Md1 | 214.86±0.18         | 1648.28±0.36 | 69.79±0.09 | 113.56±0.45 | 2.01±0.72 | 3.08±0.13 | 24.16±0.06 | 3.01±0.67 | 0.02±0.03 | 0.00±0.01 | 0.00±0.01 |
|               | Md2 | 214.09±0.12         | 1600.06±0.41 | 72.17±0.07 | 121.38±0.12 | 2.18±0.07 | 3.54±0.09 | 23.98±0.02 | 3.17±0.06 | 0.00±0.00 | 0.00±0.01 | 0.00±0.00 |
|               | Md3 | 245.76±0.04         | 1828.54±0.22 | 66.38±0.14 | 117.47±0.10 | 2.09±0.06 | 3.19±0.07 | 34.17±0.06 | 3.74±0.07 | 0.01±0.01 | 0.00±0.01 | 0.00±0.00 |
|               | Md4 | 213.07±0.10         | 1505.56±0.15 | 69.39±0.15 | 120.10±0.10 | 1.78±0.12 | 2.89±0.04 | 25.49±0.18 | 3.28±0.11 | 0.00±0.00 | 0.00±0.00 | 0.00±0.00 |
|               | Md5 | 205.69±0.19         | 1643.27±0.10 | 72.89±0.12 | 108.13±0.17 | 1.96±0.02 | 2.76±0.15 | 22.39±0.10 | 4.19±0.04 | 0.00±0.01 | 0.00±0.00 | 0.00±0.01 |
|               | Md6 | 208.37±0.14         | 1543.57±0.36 | 72.14±0.18 | 118.26±0.13 | 2.19±0.05 | 3.02±0.07 | 24.58±0.02 | 4.02±0.05 | 0.00±0.01 | 0.00±0.00 | 0.00±0.01 |
| Raspberry     | RA1 | 164.86±0.09         | 792.28±0.35  | 52.45±0.21 | 89.22±0.14  | 1.98±0.66 | 2.87±0.69 | 25.49±0.04 | 3.08±0.31 | 0.01±0.03 | 0.00±0.00 | 0.00±0.01 |
|               | RA2 | 166.11±0.15         | 790.47±0.17  | 55.19±0.14 | 90.58±0.12  | 2.11±0.06 | 2.88±0.05 | 24.17±0.17 | 3.04±0.07 | 0.00±0.01 | 0.00±0.00 | 0.00±0.00 |
|               | RA3 | 170.37±0.10         | 815.49±0.27  | 50.28±0.04 | 86.13±0.05  | 2.56±0.02 | 2.34±0.09 | 26.98±0.04 | 3.48±0.16 | 0.00±0.00 | 0.00±0.01 | 0.00±0.01 |
|               | RA4 | 167.52±0.14         | 802.75±0.10  | 49.09±0.12 | 89.28±0.12  | 1.78±0.07 | 2.56±0.04 | 20.94±0.10 | 3.23±0.06 | 0.00±0.01 | 0.00±0.00 | 0.00±0.01 |
|               | RA5 | 164.23±0.05         | 783.68±0.28  | 48.98±0.07 | 96.52±0.23  | 1.95±0.06 | 3.09±0.06 | 25.84±0.28 | 2.98±0.07 | 0.00±0.00 | 0.00±0.00 | 0.00±0.00 |
|               | RA6 | 165.18±0.12         | 760.39±0.19  | 60.35±0.10 | 92.15±0.14  | 2.08±0.04 | 2.74±0.05 | 25.30±0.07 | 3.65±0.13 | 0.01±0.03 | 0.00±0.01 | 0.00±0.00 |

Every value is a mean of three determinations (n = 3) ± standard deviations;

**Table S2.** Supplement material – Antibiotic residues of analyzed honey samples

|               |     | Antibiotic residues, ng/g |             |             |      |             |             |             |      |             |                 |
|---------------|-----|---------------------------|-------------|-------------|------|-------------|-------------|-------------|------|-------------|-----------------|
| Honey Variety |     | Nitroimidazoles           |             |             |      |             | Nitrofurans |             |      |             | Chloramphenicol |
|               |     | DMZ                       | RNZ         | MNZ         | IPZ  | IPZ-OH      | AOZ         | AMOX        | SEM  | AHD         | CAP             |
| Rapeseed      | R1  | n.d.                      | n.d.        | n.d.        | n.d. | n.d.        | n.d.        | n.d.        | n.d. | n.d.        | n.d.            |
|               | R2  | n.d.                      | n.d.        | n.d.        | n.d. | n.d.        | n.d.        | n.d.        | n.d. | n.d.        | 0.200±0.001     |
|               | R3  | n.d.                      | n.d.        | n.d.        | n.d. | n.d.        | n.d.        | n.d.        | n.d. | n.d.        | n.d.            |
|               | R4  | n.d.                      | n.d.        | n.d.        | n.d. | n.d.        | n.d.        | n.d.        | n.d. | n.d.        | n.d.            |
|               | R5  | n.d.                      | n.d.        | n.d.        | n.d. | n.d.        | n.d.        | n.d.        | n.d. | n.d.        | n.d.            |
|               | R6  | n.d.                      | n.d.        | n.d.        | n.d. | n.d.        | n.d.        | n.d.        | n.d. | n.d.        | 0.800±0.003     |
| Black locust  | BL1 | n.d.                      | n.d.        | n.d.        | n.d. | n.d.        | n.d.        | n.d.        | n.d. | n.d.        | n.d.            |
|               | BL2 | n.d.                      | n.d.        | 0.200±0.001 | n.d. | n.d.        | n.d.        | n.d.        | n.d. | n.d.        | n.d.            |
|               | BL3 | n.d.                      | n.d.        | n.d.        | n.d. | n.d.        | n.d.        | n.d.        | n.d. | n.d.        | n.d.            |
|               | BL4 | n.d.                      | n.d.        | n.d.        | n.d. | n.d.        | n.d.        | n.d.        | n.d. | n.d.        | n.d.            |
|               | BL5 | n.d.                      | n.d.        | n.d.        | n.d. | n.d.        | n.d.        | n.d.        | n.d. | n.d.        | n.d.            |
|               | BL6 | n.d.                      | n.d.        | n.d.        | n.d. | n.d.        | n.d.        | n.d.        | n.d. | n.d.        | n.d.            |
| Sunflower     | S1  | n.d.                      | n.d.        | n.d.        | n.d. | n.d.        | n.d.        | n.d.        | n.d. | n.d.        | n.d.            |
|               | S2  | n.d.                      | n.d.        | n.d.        | n.d. | n.d.        | n.d.        | n.d.        | n.d. | n.d.        | n.d.            |
|               | S3  | n.d.                      | n.d.        | n.d.        | n.d. | n.d.        | n.d.        | n.d.        | n.d. | n.d.        | n.d.            |
|               | S4  | n.d.                      | n.d.        | n.d.        | n.d. | n.d.        | n.d.        | n.d.        | n.d. | n.d.        | n.d.            |
|               | S5  | 0.700±0.002               | n.d.        | n.d.        | n.d. | n.d.        | n.d.        | n.d.        | n.d. | n.d.        | n.d.            |
|               | S6  | n.d.                      | 0.900±0.001 | n.d.        | n.d. | n.d.        | n.d.        | n.d.        | n.d. | n.d.        | n.d.            |
| Buckwheat     | B1  | n.d.                      | n.d.        | n.d.        | n.d. | n.d.        | n.d.        | n.d.        | n.d. | n.d.        | n.d.            |
|               | B2  | n.d.                      | n.d.        | n.d.        | n.d. | n.d.        | n.d.        | n.d.        | n.d. | n.d.        | n.d.            |
|               | B3  | n.d.                      | n.d.        | n.d.        | n.d. | n.d.        | n.d.        | n.d.        | n.d. | n.d.        | n.d.            |
|               | B4  | n.d.                      | n.d.        | n.d.        | n.d. | n.d.        | n.d.        | 1.173±0.027 | n.d. | n.d.        | n.d.            |
|               | B5  | n.d.                      | n.d.        | n.d.        | n.d. | n.d.        | n.d.        | n.d.        | n.d. | n.d.        | n.d.            |
|               | B6  | n.d.                      | n.d.        | n.d.        | n.d. | n.d.        | n.d.        | n.d.        | n.d. | n.d.        | n.d.            |
| Mint          | M1  | n.d.                      | n.d.        | n.d.        | n.d. | n.d.        | n.d.        | n.d.        | n.d. | n.d.        | n.d.            |
|               | M2  | n.d.                      | n.d.        | n.d.        | n.d. | n.d.        | n.d.        | n.d.        | n.d. | n.d.        | n.d.            |
|               | M3  | n.d.                      | n.d.        | n.d.        | n.d. | n.d.        | 2.236±0.051 | n.d.        | n.d. | n.d.        | n.d.            |
|               | M4  | n.d.                      | n.d.        | n.d.        | n.d. | n.d.        | n.d.        | n.d.        | n.d. | n.d.        | n.d.            |
|               | M5  | n.d.                      | n.d.        | n.d.        | n.d. | n.d.        | n.d.        | n.d.        | n.d. | 5.528±0.043 | n.d.            |
|               | M6  | n.d.                      | n.d.        | n.d.        | n.d. | 1.153±0.022 | n.d.        | n.d.        | n.d. | n.d.        | n.d.            |

Table S2. Cont.

| Honey Variety |     | Antibiotic residues, ng/g |      |      |             |        |             |      |             |      | Chloramphenicol<br>CAP |
|---------------|-----|---------------------------|------|------|-------------|--------|-------------|------|-------------|------|------------------------|
|               |     | Nitroimidazoles           |      |      |             |        | Nitrofurans |      |             |      |                        |
|               |     | DMZ                       | RNZ  | MNZ  | IPZ         | IPZ-OH | AOZ         | AMOX | SEM         | AHD  |                        |
| Dandelion     | D1  | n.d.                      | n.d. | n.d. | n.d.        | n.d.   | n.d.        | n.d. | n.d.        | n.d. | n.d.                   |
|               | D2  | n.d.                      | n.d. | n.d. | n.d.        | n.d.   | n.d.        | n.d. | n.d.        | n.d. | n.d.                   |
|               | D3  | n.d.                      | n.d. | n.d. | n.d.        | n.d.   | n.d.        | n.d. | n.d.        | n.d. | n.d.                   |
|               | D4  | n.d.                      | n.d. | n.d. | 1.820±0.002 | n.d.   | n.d.        | n.d. | n.d.        | n.d. | n.d.                   |
|               | D5  | n.d.                      | n.d. | n.d. | n.d.        | n.d.   | n.d.        | n.d. | n.d.        | n.d. | n.d.                   |
|               | D6  | n.d.                      | n.d. | n.d. | n.d.        | n.d.   | n.d.        | n.d. | 1.437±0.005 | n.d. | n.d.                   |
| Meadow        | Md1 | n.d.                      | n.d. | n.d. | n.d.        | n.d.   | n.d.        | n.d. | n.d.        | n.d. | n.d.                   |
|               | Md2 | n.d.                      | n.d. | n.d. | n.d.        | n.d.   | n.d.        | n.d. | n.d.        | n.d. | n.d.                   |
|               | Md3 | n.d.                      | n.d. | n.d. | n.d.        | n.d.   | n.d.        | n.d. | n.d.        | n.d. | n.d.                   |
|               | Md4 | n.d.                      | n.d. | n.d. | n.d.        | n.d.   | n.d.        | n.d. | n.d.        | n.d. | n.d.                   |
|               | Md5 | n.d.                      | n.d. | n.d. | n.d.        | n.d.   | n.d.        | n.d. | n.d.        | n.d. | n.d.                   |
|               | Md6 | n.d.                      | n.d. | n.d. | n.d.        | n.d.   | n.d.        | n.d. | n.d.        | n.d. | n.d.                   |
| Raspberry     | RA1 | n.d.                      | n.d. | n.d. | n.d.        | n.d.   | n.d.        | n.d. | n.d.        | n.d. | n.d.                   |
|               | RA2 | n.d.                      | n.d. | n.d. | n.d.        | n.d.   | n.d.        | n.d. | n.d.        | n.d. | n.d.                   |
|               | RA3 | n.d.                      | n.d. | n.d. | 0.200±0.001 | n.d.   | n.d.        | n.d. | n.d.        | n.d. | n.d.                   |
|               | RA4 | n.d.                      | n.d. | n.d. | n.d.        | n.d.   | n.d.        | n.d. | n.d.        | n.d. | n.d.                   |
|               | RA5 | n.d.                      | n.d. | n.d. | n.d.        | n.d.   | n.d.        | n.d. | n.d.        | n.d. | n.d.                   |
|               | RA6 | n.d.                      | n.d. | n.d. | n.d.        | n.d.   | n.d.        | n.d. | n.d.        | n.d. | n.d.                   |

Every value is a mean of three determinations (n = 3) ± standard deviations; DMZ- dimetridazole; RNZ- ronidazole; MNZ- metronidazole; IPZ- ipronidazole; IPZ-OH- ipornidazole-hydroxy; AOZ- furazolidone; AMOX- furaltadone; SEM- Nitrofurazon; AHD- Nitrofurantoin; CAP- chloramphenicol; n.d.-undetectable.

**Table S3.** Supplement material – Pesticide residues of analyzed honey samples

[illegible]

Table S3. Cont.

| Honey Variety |     | Pesticide residues, ng/g |             |             |        |        |           |            |           | Chlorpyrifos-methyl |
|---------------|-----|--------------------------|-------------|-------------|--------|--------|-----------|------------|-----------|---------------------|
|               |     | Imidacloprid             | Acetamiprid | Lindane     | Aldrin | Endrin | Chlordane | Endosulfan | Coumaphos |                     |
| Dandelion     | D1  | n.d.                     | n.d.        | n.d.        | n.d.   | n.d.   | n.d.      | n.d.       | n.d.      | n.d.                |
|               | D2  | n.d.                     | n.d.        | n.d.        | n.d.   | n.d.   | n.d.      | n.d.       | n.d.      | n.d.                |
|               | D3  | n.d.                     | n.d.        | n.d.        | n.d.   | n.d.   | n.d.      | n.d.       | n.d.      | n.d.                |
|               | D4  | n.d.                     | n.d.        | n.d.        | n.d.   | n.d.   | n.d.      | n.d.       | n.d.      | n.d.                |
|               | D5  | n.d.                     | 1.385±0.019 | n.d.        | n.d.   | n.d.   | n.d.      | n.d.       | n.d.      | n.d.                |
|               | D6  | 0.740±0.002              | n.d.        | n.d.        | n.d.   | n.d.   | n.d.      | n.d.       | n.d.      | n.d.                |
| Meadow        | Md1 | n.d.                     | n.d.        | n.d.        | n.d.   | n.d.   | n.d.      | n.d.       | n.d.      | n.d.                |
|               | Md2 | n.d.                     | n.d.        | n.d.        | n.d.   | n.d.   | n.d.      | n.d.       | n.d.      | n.d.                |
|               | Md3 | n.d.                     | n.d.        | n.d.        | n.d.   | n.d.   | n.d.      | n.d.       | n.d.      | n.d.                |
|               | Md4 | n.d.                     | n.d.        | n.d.        | n.d.   | n.d.   | n.d.      | n.d.       | n.d.      | n.d.                |
|               | Md5 | n.d.                     | n.d.        | n.d.        | n.d.   | n.d.   | n.d.      | n.d.       | n.d.      | n.d.                |
|               | Md6 | n.d.                     | n.d.        | 0.100±0.002 | n.d.   | n.d.   | n.d.      | n.d.       | n.d.      | n.d.                |
| Raspberry     | RA1 | n.d.                     | n.d.        | n.d.        | n.d.   | n.d.   | n.d.      | n.d.       | n.d.      | n.d.                |
|               | RA2 | n.d.                     | n.d.        | n.d.        | n.d.   | n.d.   | n.d.      | n.d.       | n.d.      | n.d.                |
|               | RA3 | n.d.                     | 0.100±0.002 | n.d.        | n.d.   | n.d.   | n.d.      | n.d.       | n.d.      | n.d.                |
|               | RA4 | n.d.                     | n.d.        | n.d.        | n.d.   | n.d.   | n.d.      | n.d.       | n.d.      | n.d.                |
|               | RA5 | n.d.                     | n.d.        | n.d.        | n.d.   | n.d.   | n.d.      | n.d.       | n.d.      | n.d.                |
|               | RA6 | n.d.                     | n.d.        | n.d.        | n.d.   | n.d.   | n.d.      | n.d.       | n.d.      | n.d.                |

Every value is a mean of three determinations (n = 3) ± standard deviations; n.d.-undetectable.

**Tables S4.** Pearson correlation for physicochemical parameters and minerals of different type of honey

**Table S4a.** Pearson correlation for physicochemical parameters and minerals of rapeseed honey

| Variables | W        | S            | HMF          | ID       | L*           | a*           | b*           | C            | H        | YI       | Na           | Ca       | Mn       |
|-----------|----------|--------------|--------------|----------|--------------|--------------|--------------|--------------|----------|----------|--------------|----------|----------|
| W         | <b>1</b> |              |              |          |              |              |              |              |          |          |              |          |          |
| S         | 0.505    | <b>1</b>     |              |          |              |              |              |              |          |          |              |          |          |
| HMF       | 0.469    | <b>0.910</b> | <b>1</b>     |          |              |              |              |              |          |          |              |          |          |
| ID        | 0.676    | <b>0.806</b> | <b>0.924</b> | <b>1</b> |              |              |              |              |          |          |              |          |          |
| L*        | 0.001    | 0.000        | 0.051        | 0.096    | <b>1</b>     |              |              |              |          |          |              |          |          |
| a*        | 0.040    | 0.194        | 0.390        | 0.384    | 0.766        | <b>1</b>     |              |              |          |          |              |          |          |
| b*        | 0.086    | 0.055        | 0.165        | 0.197    | 0.541        | 0.563        | <b>1</b>     |              |          |          |              |          |          |
| C         | 0.088    | 0.060        | 0.173        | 0.206    | 0.553        | 0.580        | <b>1.000</b> | <b>1</b>     |          |          |              |          |          |
| H         | 0.019    | 0.193        | 0.376        | 0.352    | 0.728        | <b>0.983</b> | 0.436        | 0.453        | <b>1</b> |          |              |          |          |
| YI        | 0.058    | 0.061        | 0.207        | 0.258    | <b>0.842</b> | <b>0.840</b> | <b>0.866</b> | <b>0.876</b> | 0.741    | <b>1</b> |              |          |          |
| Na        | 0.604    | 0.361        | 0.544        | 0.668    | 0.066        | 0.180        | 0.338        | 0.342        | 0.116    | 0.262    | <b>1</b>     |          |          |
| Ca        | 0.001    | 0.349        | 0.221        | 0.066    | 0.340        | 0.021        | 0.138        | 0.135        | 0.008    | 0.173    | 0.002        | <b>1</b> |          |
| Mn        | 0.396    | 0.335        | 0.530        | 0.578    | 0.016        | 0.112        | 0.133        | 0.137        | 0.079    | 0.114    | <b>0.881</b> | 0.064    | <b>1</b> |

W-water content, S- sucrose, ID- diastase activity, HMF- hydroxymethylfurfural, C-chroma, H-hue angle, YI- yellow index, Na-sodium, Ca- calcium, Mn- manganese.

**Table S4b.** Pearson correlation for physicochemical parameters and minerals of black locust honey

| Variables | W             | F             | S             | G/F      | G/W           | EC           | HMF           | ID            | L*       | a*            | b*       | H            | YI            | Na       | K        | Mg       | Ca | Mn | Cu | Cd |
|-----------|---------------|---------------|---------------|----------|---------------|--------------|---------------|---------------|----------|---------------|----------|--------------|---------------|----------|----------|----------|----|----|----|----|
| W         | <b>1</b>      |               |               |          |               |              |               |               |          |               |          |              |               |          |          |          |    |    |    |    |
| F         | -0.046        | <b>1</b>      |               |          |               |              |               |               |          |               |          |              |               |          |          |          |    |    |    |    |
| S         | 0.789         | 0.133         | <b>1</b>      |          |               |              |               |               |          |               |          |              |               |          |          |          |    |    |    |    |
| G/F       | 0.450         | <b>-0.822</b> | 0.094         | <b>1</b> |               |              |               |               |          |               |          |              |               |          |          |          |    |    |    |    |
| G/W       | -0.704        | -0.255        | <b>-0.814</b> | 0.167    | <b>1</b>      |              |               |               |          |               |          |              |               |          |          |          |    |    |    |    |
| EC        | <b>0.806</b>  | 0.478         | <b>0.802</b>  | -0.134   | <b>-0.867</b> | <b>1</b>     |               |               |          |               |          |              |               |          |          |          |    |    |    |    |
| HMF       | <b>0.963</b>  | -0.030        | <b>0.820</b>  | 0.344    | -0.799        | 0.791        | <b>1</b>      |               |          |               |          |              |               |          |          |          |    |    |    |    |
| ID        | <b>-0.906</b> | 0.109         | -0.773        | -0.316   | <b>0.845</b>  | -0.739       | <b>-0.977</b> | <b>1</b>      |          |               |          |              |               |          |          |          |    |    |    |    |
| L*        | 0.728         | 0.613         | 0.571         | -0.184   | -0.690        | <b>0.926</b> | 0.695         | -0.617        | <b>1</b> |               |          |              |               |          |          |          |    |    |    |    |
| a*        | -0.446        | 0.302         | -0.393        | -0.122   | 0.740         | -0.401       | -0.557        | 0.715         | -0.207   | <b>1</b>      |          |              |               |          |          |          |    |    |    |    |
| b*        | 0.015         | 0.294         | 0.569         | -0.314   | -0.220        | 0.171        | 0.104         | -0.037        | -0.012   | 0.235         | <b>1</b> |              |               |          |          |          |    |    |    |    |
| H         | 0.433         | -0.382        | 0.211         | 0.244    | -0.603        | 0.307        | 0.519         | -0.675        | 0.193    | <b>-0.960</b> | -0.478   | <b>1</b>     |               |          |          |          |    |    |    |    |
| YI        | -0.405        | -0.084        | 0.147         | -0.177   | 0.200         | -0.372       | -0.314        | 0.324         | -0.565   | 0.308         | 0.831    | -0.503       | <b>1</b>      |          |          |          |    |    |    |    |
| Na        | 0.736         | -0.128        | 0.692         | 0.165    | <b>-0.903</b> | 0.718        | 0.791         | <b>-0.875</b> | 0.510    | <b>-0.908</b> | -0.075   | <b>0.834</b> | -0.345        | <b>1</b> |          |          |    |    |    |    |
| K         | 0.634         | -0.095        | 0.166         | 0.281    | -0.525        | 0.523        | 0.618         | -0.677        | 0.586    | -0.671        | -0.680   | <b>0.803</b> | <b>-0.890</b> | 0.699    | <b>1</b> |          |    |    |    |    |
| Mg        | 0.342         | -0.465        | 0.148         | 0.640    | 0.146         | -0.169       | 0.393         | -0.337        | -0.116   | 0.118         | 0.126    | -0.043       | 0.142         | -0.092   | -0.003   | <b>1</b> |    |    |    |    |

|    |        |        |        |        |        |        |        |        |        |        |        |        |        |        |        |        |        |        |        |   |
|----|--------|--------|--------|--------|--------|--------|--------|--------|--------|--------|--------|--------|--------|--------|--------|--------|--------|--------|--------|---|
| Ca | -0.618 | -0.409 | -0.585 | 0.158  | 0.742  | -0.887 | -0.536 | 0.516  | -0.794 | 0.440  | 0.076  | -0.370 | 0.493  | -0.700 | -0.558 | 0.523  | 1      |        |        |   |
| Mn | 0.735  | 0.596  | 0.599  | -0.194 | -0.739 | 0.948  | 0.707  | -0.642 | 0.996  | -0.274 | -0.013 | 0.249  | -0.562 | 0.570  | 0.606  | -0.164 | -0.835 | 1      |        |   |
| Cu | 0.330  | -0.787 | -0.048 | 0.829  | 0.124  | -0.259 | 0.360  | -0.395 | -0.236 | -0.258 | -0.350 | 0.406  | -0.181 | 0.151  | 0.356  | 0.821  | 0.420  | -0.254 | 1      |   |
| Cd | 0.584  | 0.077  | 0.554  | -0.047 | -0.847 | 0.744  | 0.588  | -0.669 | 0.566  | -0.823 | -0.182 | 0.753  | -0.456 | 0.923  | 0.689  | -0.446 | -0.867 | 0.633  | -0.156 | 1 |

W-water Content, G- glucose, F- fructose, S- sucrose, G/F- glucose to fructose ratio, G/W- glucose to water content ratio, EC- electrical conductivity, ID- diastase activity, HMF- hydroxymethylfurfural, L\*, a\*, b\*, C-chroma, H-hue angle, YI- yellow index, Na-sodium, K- potassium, Mg- magnesium, Ca- calcium, Mn- manganese, Cu-copper, Cd-cadmium.



**Table S4c.** Pearson correlation for physicochemical parameters and minerals of sunflower honey

| Variables | G            | F            | G/F          | EC          | L*          | a*           | b*          | C           | Na       | Ca       | Mn          | Cu       | Zn       | Pb       | Cd       |
|-----------|--------------|--------------|--------------|-------------|-------------|--------------|-------------|-------------|----------|----------|-------------|----------|----------|----------|----------|
| G         | <b>1</b>     |              |              |             |             |              |             |             |          |          |             |          |          |          |          |
| F         | <b>-1.00</b> | <b>1</b>     |              |             |             |              |             |             |          |          |             |          |          |          |          |
| G/F       | 0.26         | -0.22        | <b>1</b>     |             |             |              |             |             |          |          |             |          |          |          |          |
| EC        | -0.33        | 0.32         | 0.16         | <b>1</b>    |             |              |             |             |          |          |             |          |          |          |          |
| L*        | -0.16        | 0.14         | 0.28         | 0.58        | <b>1</b>    |              |             |             |          |          |             |          |          |          |          |
| a*        | -0.36        | 0.42         | -0.02        | -0.61       | -0.39       | <b>1</b>     |             |             |          |          |             |          |          |          |          |
| b*        | 0.16         | -0.13        | 0.08         | -0.90       | -0.67       | 0.71         | <b>1</b>    |             |          |          |             |          |          |          |          |
| C         | 0.07         | -0.04        | 0.07         | -0.89       | -0.65       | 0.80         | <b>0.99</b> | <b>1</b>    |          |          |             |          |          |          |          |
| Na        | -0.13        | 0.14         | <b>-0.86</b> | -0.22       | -0.33       | 0.24         | -0.05       | 0.00        | <b>1</b> |          |             |          |          |          |          |
| Ca        | 0.36         | -0.41        | 0.16         | 0.59        | 0.34        | <b>-0.98</b> | -0.61       | -0.71       | -0.41    | <b>1</b> |             |          |          |          |          |
| Mn        | <b>0.81</b>  | <b>-0.82</b> | 0.53         | <b>0.85</b> | -0.40       | -0.15        | 0.51        | <b>0.82</b> | -0.63    | 0.31     | <b>1</b>    |          |          |          |          |
| Cu        | -0.32        | 0.29         | 0.33         | 0.19        | <b>0.82</b> | -0.03        | -0.19       | -0.16       | -0.49    | 0.05     | -0.19       | <b>1</b> |          |          |          |
| Zn        | <b>0.83</b>  | <b>-0.84</b> | 0.30         | 0.24        | 0.17        | -0.78        | -0.38       | -0.47       | -0.26    | 0.77     | <b>0.84</b> | -0.20    | <b>1</b> |          |          |
| Pb        | -0.37        | 0.34         | 0.28         | <b>0.87</b> | 0.33        | -0.56        | -0.62       | -0.63       | -0.49    | 0.64     | <b>0.82</b> | 0.16     | 0.15     | <b>1</b> |          |
| Cd        | <b>0.87</b>  | <b>-0.91</b> | 0.03         | -0.30       | -0.14       | -0.55        | 0.13        | 0.01        | -0.17    | 0.56     | <b>0.86</b> | -0.19    | 0.77     | -0.22    | <b>1</b> |

G- glucose, F- fructose, G/F- glucose to fructose ratio, EC- electrical conductivity, HMF- hydroxymethylfurfural, L\*, a\*, b\*, C-chroma, Na-sodium, Ca- calcium, Mn- manganese, Cu- copper, Zn-zinc, Pb- lead, Cd-cadmium,

**Table S4d.** Pearson correlation for physicochemical parameters and minerals of buckwheat honey

| Variables | W            | G            | F            | S            | G/W          | EC           | ID           | L*           | a*       | b*           | C            | YI           | Mn       | Zn       | Ni       | Cd       |
|-----------|--------------|--------------|--------------|--------------|--------------|--------------|--------------|--------------|----------|--------------|--------------|--------------|----------|----------|----------|----------|
| W         | <b>1</b>     |              |              |              |              |              |              |              |          |              |              |              |          |          |          |          |
| G         | 0.393        | <b>1</b>     |              |              |              |              |              |              |          |              |              |              |          |          |          |          |
| F         | 0.554        | <b>0.898</b> | <b>1</b>     |              |              |              |              |              |          |              |              |              |          |          |          |          |
| S         | 0.548        | <b>0.807</b> | <b>0.935</b> | <b>1</b>     |              |              |              |              |          |              |              |              |          |          |          |          |
| G/W       | 0.746        | <b>0.863</b> | <b>0.874</b> | <b>0.833</b> | <b>1</b>     |              |              |              |          |              |              |              |          |          |          |          |
| EC        | <b>0.801</b> | 0.525        | 0.596        | 0.645        | <b>0.816</b> | <b>1</b>     |              |              |          |              |              |              |          |          |          |          |
| ID        | 0.312        | 0.443        | 0.703        | 0.793        | 0.427        | 0.299        | <b>1</b>     |              |          |              |              |              |          |          |          |          |
| L*        | <b>0.824</b> | 0.184        | 0.261        | 0.230        | 0.504        | 0.743        | 0.057        | <b>1</b>     |          |              |              |              |          |          |          |          |
| a*        | 0.040        | 0.026        | 0.045        | 0.003        | 0.001        | 0.021        | 0.047        | 0.027        | <b>1</b> |              |              |              |          |          |          |          |
| b*        | 0.755        | 0.535        | 0.618        | 0.553        | 0.775        | <b>0.899</b> | 0.258        | 0.785        | 0.016    | <b>1</b>     |              |              |          |          |          |          |
| C         | 0.755        | 0.535        | 0.618        | 0.553        | 0.775        | <b>0.899</b> | 0.258        | 0.785        | 0.016    | <b>1.000</b> | <b>1</b>     |              |          |          |          |          |
| YI        | 0.526        | 0.703        | 0.765        | 0.685        | 0.767        | 0.767        | 0.406        | 0.470        | 0.110    | <b>0.893</b> | <b>0.893</b> | <b>1</b>     |          |          |          |          |
| Mn        | 0.036        | 0.036        | 0.059        | 0.009        | 0.002        | 0.154        | 0.019        | 0.624        | 0.091    | 0.419        | 0.169        | 0.046        | <b>1</b> |          |          |          |
| Zn        | 0.510        | 0.219        | 0.225        | 0.162        | 0.428        | 0.665        | 0.013        | <b>0.819</b> | 0.011    | <b>0.825</b> | <b>0.825</b> | 0.617        | 0.109    | <b>1</b> |          |          |
| Ni        | 0.081        | 0.207        | 0.368        | 0.520        | 0.157        | 0.069        | <b>0.822</b> | 0.010        | 0.000    | 0.019        | 0.019        | 0.084        | 0.046    | 0.077    | <b>1</b> |          |
| Cd        | 0.483        | <b>0.829</b> | <b>0.943</b> | <b>0.881</b> | 0.796        | 0.630        | 0.681        | 0.273        | 0.118    | 0.700        | 0.700        | <b>0.896</b> | 0.034    | 0.315    | 0.305    | <b>1</b> |

W-Water Content, G- glucose, F- fructose, S- sucrose, G/W- glucose to water content ratio, EC- electrical conductivity, ID- diastase activity, L\*, a\*, b\*, C-chroma, YI- yellow index, Mn- manganese, Zn-zinc, Ni- nickel, Cd-cadmium.

**Table S4e.** Pearson correlation for physicochemical parameters and minerals of mint honey

| Variables | G           | F           | G/F      | HMF         | ID       | K           | Mg          | Ca       | Mn       | Fe       | Zn       | Ni       | Pb       | Cd       |
|-----------|-------------|-------------|----------|-------------|----------|-------------|-------------|----------|----------|----------|----------|----------|----------|----------|
| G         | <b>1</b>    |             |          |             |          |             |             |          |          |          |          |          |          |          |
| F         | <b>0.89</b> | <b>1</b>    |          |             |          |             |             |          |          |          |          |          |          |          |
| G/F       | <b>0.95</b> | <b>0.89</b> | <b>1</b> |             |          |             |             |          |          |          |          |          |          |          |
| HMF       | 0.78        | <b>0.92</b> | 0.73     | <b>1</b>    |          |             |             |          |          |          |          |          |          |          |
| ID        | 0.65        | <b>0.80</b> | 0.79     | 0.64        | <b>1</b> |             |             |          |          |          |          |          |          |          |
| K         | 0.01        | 0.07        | 0.05     | 0.01        | 0.18     | <b>1</b>    |             |          |          |          |          |          |          |          |
| Mg        | 0.40        | 0.28        | 0.24     | 0.35        | 0.14     | 0.30        | <b>1</b>    |          |          |          |          |          |          |          |
| Ca        | 0.03        | 0.14        | 0.01     | 0.35        | 0.06     | 0.04        | 0.08        | <b>1</b> |          |          |          |          |          |          |
| Mn        | 0.08        | 0.01        | 0.03     | 0.08        | 0.01     | <b>0.82</b> | 0.43        | 0.11     | <b>1</b> |          |          |          |          |          |
| Fe        | 0.76        | 0.79        | 0.80     | <b>0.83</b> | 0.66     | 0.00        | 0.23        | 0.22     | 0.16     | <b>1</b> |          |          |          |          |
| Zn        | 0.00        | 0.03        | 0.02     | 0.00        | 0.05     | <b>0.86</b> | 0.49        | 0.04     | 0.70     | 0.00     | <b>1</b> |          |          |          |
| Ni        | 0.40        | 0.26        | 0.23     | 0.35        | 0.11     | 0.36        | <b>0.99</b> | 0.09     | 0.52     | 0.25     | 0.53     | <b>1</b> |          |          |
| Pb        | <b>0.83</b> | 0.76        | 0.76     | 0.74        | 0.68     | 0.01        | 0.68        | 0.09     | 0.17     | 0.69     | 0.09     | 0.65     | <b>1</b> |          |
| Cd        | <b>0.80</b> | 0.53        | 0.73     | 0.41        | 0.44     | 0.02        | 0.58        | 0.01     | 0.17     | 0.46     | 0.08     | 0.56     | 0.79     | <b>1</b> |

G- glucose, F- fructose, G/F- glucose to fructose ratio, HMF- Hydroxymethylfurfural, ID- diastase activity, K- potassium, Mg- magnesium, Ca- calcium, Mn- manganese, Fe- iron, Zn- zinc, Ni- nickel, Pb- lead, Cd-cadmium.

**Table S4f.** Pearson correlation for physicochemical parameters and minerals of dandelion honey

| Variables | G     | F     | S     | G/F   | HMF   | ID    | L*    | a*    | b*    | Mn    | Cu    | Fe    | Cd |
|-----------|-------|-------|-------|-------|-------|-------|-------|-------|-------|-------|-------|-------|----|
| G         | 1     |       |       |       |       |       |       |       |       |       |       |       |    |
| F         | 0.625 | 1     |       |       |       |       |       |       |       |       |       |       |    |
| S         | 0.884 | 0.512 | 1     |       |       |       |       |       |       |       |       |       |    |
| G/F       | 0.969 | 0.498 | 0.904 | 1     |       |       |       |       |       |       |       |       |    |
| HMF       | 0.902 | 0.416 | 0.938 | 0.967 | 1     |       |       |       |       |       |       |       |    |
| ID        | 0.579 | 0.940 | 0.572 | 0.491 | 0.438 | 1     |       |       |       |       |       |       |    |
| L*        | 0.000 | 0.250 | 0.014 | 0.003 | 0.012 | 0.223 | 1     |       |       |       |       |       |    |
| a*        | 0.028 | 0.018 | 0.031 | 0.072 | 0.112 | 0.025 | 0.236 | 1     |       |       |       |       |    |
| b*        | 0.076 | 0.038 | 0.101 | 0.083 | 0.079 | 0.035 | 0.838 | 0.384 | 1     |       |       |       |    |
| Mn        | 0.476 | 0.361 | 0.501 | 0.391 | 0.321 | 0.089 | 0.237 | 0.335 | 0.449 | 1     |       |       |    |
| Cu        | 0.180 | 0.135 | 0.065 | 0.197 | 0.102 | 0.145 | 0.080 | 0.021 | 0.000 | 0.801 | 1     |       |    |
| Fe        | 0.534 | 0.178 | 0.804 | 0.645 | 0.800 | 0.267 | 0.056 | 0.144 | 0.070 | 0.181 | 0.000 | 1     |    |
| Cd        | 0.055 | 0.002 | 0.158 | 0.111 | 0.234 | 0.000 | 0.034 | 0.407 | 0.003 | 0.433 | 0.202 | 0.507 | 1  |

G- glucose, F- fructose, S-sucrose, G/F- glucose to fructose ratio, HMF- Hydroxymethylfurfural, ID- diastase activity, L\*, a\*, b\*, Mn- manganese, Cu-copper, Fe- iron, Cd-cadmium.

**Table S4g.** Pearson correlation for physicochemical parameters and minerals of meadow honey

| Variables | W     | G     | F     | S     | G/F   | G/W   | EC    | L*    | a*    | b*    | H     | Na    | K     | Mg    | Fe |
|-----------|-------|-------|-------|-------|-------|-------|-------|-------|-------|-------|-------|-------|-------|-------|----|
| W         | 1     |       |       |       |       |       |       |       |       |       |       |       |       |       |    |
| G         | 0.105 | 1     |       |       |       |       |       |       |       |       |       |       |       |       |    |
| F         | 0.086 | 0.938 | 1     |       |       |       |       |       |       |       |       |       |       |       |    |
| S         | 0.387 | 0.024 | 0.000 | 1     |       |       |       |       |       |       |       |       |       |       |    |
| G/F       | 0.081 | 0.983 | 0.957 | 0.001 | 1     |       |       |       |       |       |       |       |       |       |    |
| G/W       | 0.905 | 0.358 | 0.314 | 0.349 | 0.312 | 1     |       |       |       |       |       |       |       |       |    |
| EC        | 0.968 | 0.182 | 0.167 | 0.252 | 0.162 | 0.939 | 1     |       |       |       |       |       |       |       |    |
| L*        | 0.182 | 0.824 | 0.909 | 0.000 | 0.879 | 0.416 | 0.296 | 1     |       |       |       |       |       |       |    |
| a*        | 0.397 | 0.483 | 0.552 | 0.248 | 0.431 | 0.576 | 0.405 | 0.569 | 1     |       |       |       |       |       |    |
| b*        | 0.571 | 0.469 | 0.548 | 0.016 | 0.506 | 0.723 | 0.712 | 0.772 | 0.559 | 1     |       |       |       |       |    |
| H         | 0.471 | 0.560 | 0.630 | 0.196 | 0.521 | 0.676 | 0.511 | 0.684 | 0.975 | 0.705 | 1     |       |       |       |    |
| Na        | 0.592 | 0.125 | 0.134 | 0.513 | 0.073 | 0.610 | 0.520 | 0.106 | 0.591 | 0.263 | 0.560 | 1     |       |       |    |
| K         | 0.251 | 0.136 | 0.078 | 0.801 | 0.062 | 0.320 | 0.172 | 0.020 | 0.400 | 0.025 | 0.321 | 0.694 | 1     |       |    |
| Mg        | 0.600 | 0.195 | 0.269 | 0.284 | 0.161 | 0.642 | 0.571 | 0.324 | 0.852 | 0.539 | 0.834 | 0.796 | 0.382 | 1     |    |
| Fe        | 0.587 | 0.029 | 0.045 | 0.458 | 0.009 | 0.515 | 0.491 | 0.044 | 0.498 | 0.215 | 0.459 | 0.952 | 0.560 | 0.799 | 1  |

W-Water Content, G- glucose, F- fructose, S-sucrose, G/F- glucose to fructose ratio, G/W- glucose to water content ratio, EC- electrical conductivity L\*, a\*, b\*, H-Hue Angle, Na- sodium, K- potassium, Mg- magnesium, Fe- iron.

**Table S4h.** Pearson correlation for physicochemical parameters and minerals of raspberry honey

| Variables | W        | S            | ID       | L*       | a*           | b*       | IPZ          | Na           | Mn       | Cu       | Fe       | Ni       |
|-----------|----------|--------------|----------|----------|--------------|----------|--------------|--------------|----------|----------|----------|----------|
| W         | <b>1</b> |              |          |          |              |          |              |              |          |          |          |          |
| S         | 0.652    | <b>1</b>     |          |          |              |          |              |              |          |          |          |          |
| ID        | 0.504    | <b>0.932</b> | <b>1</b> |          |              |          |              |              |          |          |          |          |
| L*        | 0.129    | 0.067        | 0.010    | <b>1</b> |              |          |              |              |          |          |          |          |
| a*        | 0.098    | 0.023        | 0.044    | 0.006    | <b>1</b>     |          |              |              |          |          |          |          |
| b*        | 0.005    | 0.004        | 0.006    | 0.003    | <b>0.819</b> | <b>1</b> |              |              |          |          |          |          |
| IPZ       | 0.400    | 0.260        | 0.079    | 0.677    | 0.005        | 0.143    | <b>1</b>     |              |          |          |          |          |
| Na        | 0.000    | 0.025        | 0.037    | 0.270    | 0.192        | 0.047    | 0.061        | <b>1</b>     |          |          |          |          |
| Mn        | 0.181    | 0.206        | 0.089    | 0.038    | 0.091        | 0.015    | 0.303        | 0.446        | <b>1</b> |          |          |          |
| Cu        | 0.079    | 0.000        | 0.001    | 0.368    | 0.016        | 0.001    | 0.119        | <b>0.863</b> | 0.302    | <b>1</b> |          |          |
| Fe        | 0.222    | 0.257        | 0.098    | 0.645    | 0.017        | 0.042    | <b>0.812</b> | 0.001        | 0.516    | 0.005    | <b>1</b> |          |
| Ni        | 0.063    | 0.001        | 0.002    | 0.069    | <b>0.804</b> | 0.748    | 0.100        | 0.216        | 0.019    | 0.029    | 0.051    | <b>1</b> |

W-Water Content, S-sucrose, ID- diastase activity, L\*, a\*, b\*, Na-sodium, Mn- manganese, Cu-copper, Fe- iron, Ni- nickel.
